# Supplementary material for: Efficient proton conductivity of a novel 3D open-framework vanadoborate with [V6B20] architectures
Source: Royal Society of Chemistry journal article supplement (doi:10.1039/d0dt04426a), 2021-01-01
Supplement: d0dt04426a1.pdf [file d0dt04426a1.pdf]

## Supplementary Information

### **Efficient proton conductivity in a novel 3D open-framework vanadoborate with [V<sub>6</sub>B<sub>20</sub>] architectures**

Le Zhang<sup>a</sup>, Xinxin Liu<sup>b</sup>, Mingyu Shang<sup>c</sup>, Fuxing Sun<sup>a</sup>, Juan Jian<sup>a</sup>, Ke Bu<sup>a</sup>, Decheng Zeng<sup>a</sup> and Hongming Yuan<sup>\*,a</sup>

*<sup>a</sup>State Key Laboratory of Inorganic Synthesis and Preparative Chemistry, College of Chemistry, Jilin University, Changchun 130012, P. R. China*

*<sup>b</sup>Institute of Catalysis for Energy and Environment, College of Chemistry and Chemical Engineering, Shenyang Normal University, Shenyang 110034, P. R. China*

*<sup>c</sup>College of Earth Sciences, Jilin University Changchun, P. R.China*

*E-mail: hmyuan@jlu.edu.cn; Fax: +86-0431-85168318*

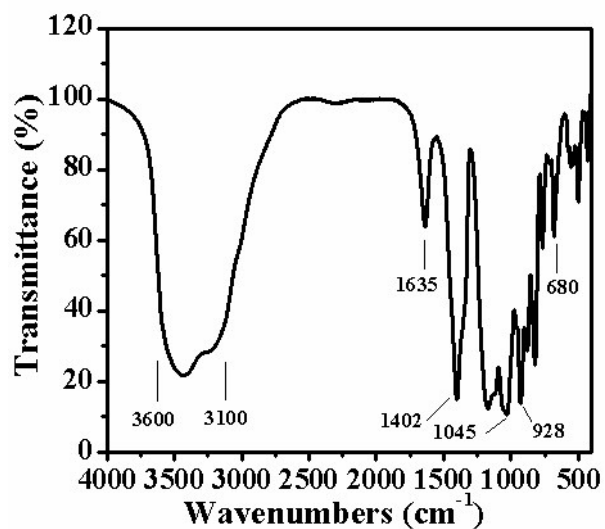

Fig. S1 FT-IR spectrum of compound 1.

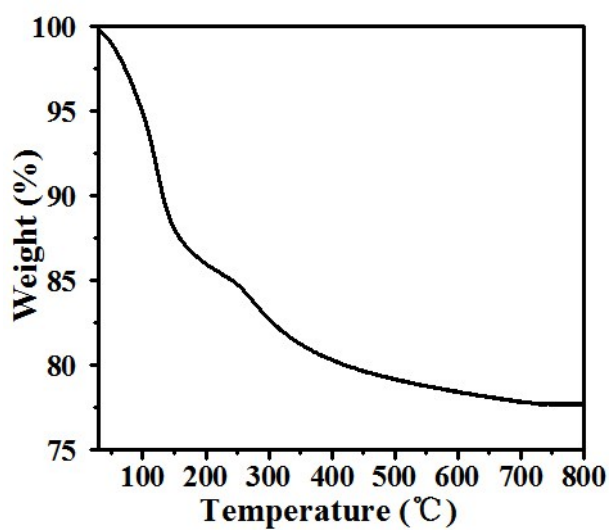

Fig. S2 TGA curve of compound 1.

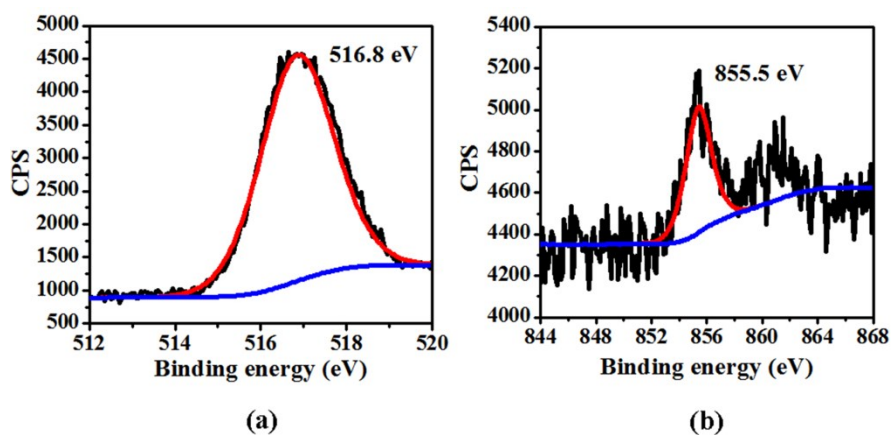

**Fig. S3** XPS spectra of V  $2P_{3/2}$  (a) and Ni  $2P_{3/2}$  (b).

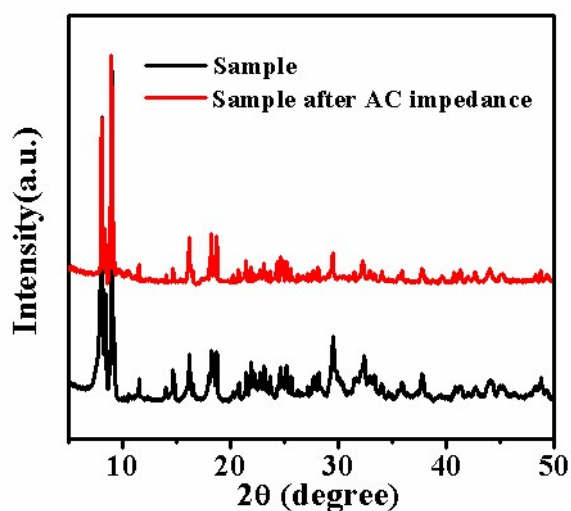

**Fig. S4** The XRD patterns of sample (black) and the sample used impedance measurement.

**Table S1** Selected bonds length (Å) and angles (°) for **1**.

|               |          |              |          |
|---------------|----------|--------------|----------|
| Ni(1)-O(8)    | 2.024(4) | V(1)-O(23)   | 1.601(5) |
| Ni(1)-O(8)#1  | 2.024(4) | V(1)-O(17)   | 1.959(4) |
| Ni(1)-O(26)   | 2.069(5) | V(1)-O(19)   | 1.960(4) |
| Ni(1)-O(26)#1 | 2.068(5) | V(1)-O(11)#2 | 1.972(4) |
| Ni(1)-O(12)   | 2.075(4) | V(1)-O(9)#2  | 1.976(4) |
| Ni(1)-O(12)#1 | 2.076(4) | V(3)-O(25)   | 1.612(5) |
| V(2)-O(24)    | 1.616(5) | V(3)-O(6)#2  | 1.950(4) |
| V(2)-O(17)    | 1.946(4) | V(3)-O(15)   | 1.951(4) |
| V(2)-O(6)#2   | 1.948(5) | V(3)-O(11)   | 1.955(4) |
| V(2)-O(15)    | 1.965(4) | V(3)-O(19)#2 | 1.960(4) |
| V(2)-O(9)#2   | 1.971(4) | B(1)-O(1)    | 1.475(8) |
| B(2)-O(5)     | 1.420(8) | B(1)-O(2)    | 1.423(8) |
| B(2)-O(6)     | 1.461(8) | B(1)-O(3)    | 1.530(8) |
| B(2)-O(7)     | 1.470(8) | B(1)-O(4)    | 1.467(8) |
| B(2)-O(1)     | 1.530(8) | B(3)-O(1)    | 1.523(8) |
| B(4)-O(3)     | 1.503(8) | B(3)-O(8)    | 1.436(8) |
| B(4)-O(8)     | 1.439(8) | B(3)-O(9)    | 1.454(8) |
| B(4)-O(11)    | 1.437(8) | B(3)-O(10)   | 1.452(8) |
| B(4)-O(12)    | 1.488(8) | B(5)-O(3)    | 1.541(8) |
| B(6)-O(2)     | 1.539(8) | B(5)-O(13)   | 1.469(8) |

---

|                     |            |                     |            |
|---------------------|------------|---------------------|------------|
| B(6)-O(14)          | 1.426(8)   | B(5)-O(14)          | 1.421(8)   |
| B(6)-O(16)          | 1.462(8)   | B(5)-O(15)          | 1.461(8)   |
| B(6)-O(17)          | 1.465(8)   | B(7)-O(5)           | 1.416(8)   |
| B(8)-O(7)           | 1.358(8)   | B(7)-O(2)           | 1.539(8)   |
| B(8)-O(10)          | 1.369(7)   | B(7)-O(18)          | 1.473(8)   |
| B(8)-O(20)          | 1.371(8)   | B(7)-O(19)          | 1.446(8)   |
| B(10)-O(16)         | 1.367(9)   | B(9)-O(12)          | 1.374(8)   |
| B(10)-O(18)         | 1.473(8)   | B(9)-O(13)          | 1.364(8)   |
| B(10)-O(22)         | 1.382(9)   | B(9)-O(21)          | 1.363(8)   |
| Na(1)-O(5)          | 2.246(6)   | O(23)-V(1)-O(17)    | 109.7(2)   |
| Na(1)-O(7)          | 2.584(6)   | O(23)-V(1)-O(19)    | 108.3(2)   |
| Na(1)-O(27)         | 2.404(10)  | O(17)-V(1)-O(19)    | 91.00(18)  |
| Na(1)-O(28A)        | 2.726(17)  | O(23)-V(1)-O(11)#2  | 109.6(2)   |
| Na(1)#4-O(20)       | 2.292(7)   | O(17)-V(1)-O(11)#2  | 140.66(18) |
| Na(1)#5-O(22)       | 2.267(14)  | O(19)-V(1)-O(11)#2  | 75.77(18)  |
| Na(2)-O(14)         | 2.424(9)   | O(23)-V(1)-O(9)#2   | 110.1(2)   |
| Na(2)-O(4)          | 2.627(9)   | O(17)-V(1)-O(9)#2   | 76.85(17)  |
| Na(2)-O(30A)        | 2.562(6)   | O(19)-V(1)-O(9)#2   | 141.59(19) |
| Na(2)-O(30B)        | 2.462(2)   | O(11)#2-V(1)-O(9)#2 | 90.75(18)  |
| Na(2)-O(29A)        | 2.511(16)  | O(24)-V(2)-O(17)    | 110.4(2)   |
| Na(2)#3-O(14)       | 2.402(9)   | O(24)-V(2)-O(6)#2   | 109.7(2)   |
| O(25)-V(3)-O(6)#2   | 109.9(2)   | O(17)-V(2)-O(6)#2   | 139.85(18) |
| O(25)-V(3)-O(15)    | 109.5(2)   | O(24)-V(2)-O(15)    | 110.5(2)   |
| O(6)#2-V(3)-O(15)   | 77.00(18)  | O(17)-V(2)-O(15)    | 89.48(18)  |
| O(25)-V(3)-O(11)    | 109.0(2)   | O(6)#2-V(2)-O(15)   | 76.70(18)  |
| O(6)#2-V(3)-O(11)   | 141.11(19) | O(24)-V(2)-O(9)#2   | 108.6(2)   |
| O(15)-V(3)-O(11)    | 90.48(18)  | O(17)-V(2)-O(9)#2   | 77.27(17)  |
| O(25)-V(3)-O(19)#2  | 109.4(2)   | O(6)#2-V(2)-O(9)#2  | 89.98(18)  |
| O(6)#2-V(3)-O(19)#2 | 90.68(18)  | O(15)-V(2)-O(9)#2   | 140.88(18) |
| O(15)-V(3)-O(19)#2  | 141.06(18) | O(4)-B(1)-O(2)      | 112.1(5)   |
| O(11)-V(3)-O(19)#2  | 76.17(18)  | O(4)-B(1)-O(1)      | 111.8(5)   |
| O(5)-B(2)-O(6)      | 113.4(5)   | O(2)-B(1)-O(1)      | 109.1(5)   |
| O(5)-B(2)-O(7)      | 110.3(5)   | O(4)-B(1)-O(3)      | 109.3(5)   |
| O(6)-B(2)-O(7)      | 109.5(5)   | O(2)-B(1)-O(3)      | 106.7(5)   |
| O(5)-B(2)-O(1)      | 108.6(5)   | O(1)-B(1)-O(3)      | 107.5(5)   |
| O(6)-B(2)-O(1)      | 107.7(5)   | O(8)-B(3)-O(10)     | 110.9(5)   |
| O(7)-B(2)-O(1)      | 107.2(5)   | O(8)-B(3)-O(9)      | 110.7(5)   |
| O(11)-B(4)-O(8)     | 113.9(5)   | O(10)-B(3)-O(9)     | 111.7(5)   |
| O(11)-B(4)-O(12)    | 112.0(5)   | O(8)-B(3)-O(1)      | 108.0(5)   |
| O(8)-B(4)-O(12)     | 104.0(5)   | O(10)-B(3)-O(1)     | 107.8(5)   |

---

|                   |          |                   |          |
|-------------------|----------|-------------------|----------|
| O(11)-B(4)-O(3)   | 109.6(5) | O(9)-B(3)-O(1)    | 107.7(5) |
| O(8)-B(4)-O(3)    | 109.4(5) | O(14)-B(5)-O(15)  | 113.3(5) |
| O(12)-B(4)-O(3)   | 107.6(5) | O(14)-B(5)-O(13)  | 111.0(5) |
| O(14)-B(6)-O(16)  | 110.4(5) | O(15)-B(5)-O(13)  | 110.8(5) |
| O(14)-B(6)-O(17)  | 113.2(5) | O(14)-B(5)-O(3)   | 108.1(5) |
| O(16)-B(6)-O(17)  | 110.2(5) | O(15)-B(5)-O(3)   | 106.8(5) |
| O(14)-B(6)-O(2)   | 109.1(5) | O(14)-B(5)-O(3)   | 106.5(5) |
| O(16)-B(6)-O(2)   | 107.1(5) | O(5)-B(7)-O(19)   | 113.8(5) |
| O(17)-B(6)-O(2)   | 106.6(5) | O(5)-B(7)-O(18)   | 110.5(5) |
| O(7)-B(8)-O(20)   | 121.3(6) | O(19)-B(7)-O(18)  | 109.8(5) |
| O(7)-B(8)-O(10)   | 123.1(6) | O(5)-B(7)-O(2)    | 108.7(5) |
| O(20)-B(8)-O(10)  | 115.5(6) | O(19)-B(7)-O(2)   | 107.2(5) |
| O(18)-B(10)-O(16) | 124.3(6) | O(18)-B(7)-O(2)   | 106.5(5) |
| O(18)-B(10)-O(22) | 116.3(6) | O(21)-B(9)-O(13)  | 118.2(6) |
|                   |          | O(21)-B(9)-O(12)  | 119.8(6) |
|                   |          | O(12)-B(9)-O(13)  | 122.0(6) |
|                   |          | O(16)-B(10)-O(22) | 119.4(6) |

Symmetry transformations used to generate equivalent atoms:

#1  $-x+2,-y+1,-z+2$     #2  $-x+1,-y+1,-z+2$     #3  $x+1,-y+1/2,-z+1$   
#4  $x+1/2,-y+1/2,z+1/2$     #5  $x-1/2,-y-1/2,z-1/2$

**Table S2** The BVS calculations suggest the following central atom valencies :

|     |    |          |     |    |          |
|-----|----|----------|-----|----|----------|
| Ni1 | +2 | ( 0.146) | B5  | +3 | ( 0.057) |
| V1  | +4 | ( 0.078) | B6  | +3 | ( 0.055) |
| V2  | +4 | ( 0.078) | B7  | +3 | ( 0.098) |
| V3  | +4 | ( 0.121) | B8  | +3 | ( 0.018) |
| B1  | +3 | ( 0.047) | B9  | +3 | ( 0.038) |
| B2  | +3 | ( 0.078) | B10 | +3 | ( 0.020) |
| B3  | +3 | ( 0.106) | Na1 | +1 | ( 0.034) |
| B4  | +3 | ( 0.096) | Na2 | +1 | ( 0.052) |
